# Supplementary material
Source: MDPI journal article supplement (https://www.mdpi.com/2073-4395/13/9/2385)
Supplement: s1 [file s1]

**Table S1.** Ecological characteristics of the studied locations.

| Location                   | Code    | Latitude | Longitude | Region   | maT      | maR (mm yr <sup>-1</sup> ) | ar m asl     |
|----------------------------|---------|----------|-----------|----------|----------|----------------------------|--------------|
| Chimaltenango              | Chi     | 90.683   | 14.595    | Central  | 9.2 °C   | 1779 to 2573               | 2097 to 3962 |
| Sacatepéquez-Chimaltenango | Sac-Chi | 90.810   | 14.594    |          |          |                            |              |
| Sacatepéquez               | Sac     | 91.063   | 14.801    |          |          |                            |              |
| Sololá                     | Sol     | 91.156   | 14.832    |          |          |                            |              |
| Totonicapán-Quiché         | To-Qui  | 91.416   | 15.024    | Western  | 10.4 °C  | 1141 to 2056               | 1801 to 2990 |
| Huehuetenango              | Hue     | 91.128   | 15.822    |          |          |                            |              |
| Baja Verapaz               | BV      | 89.943   | 15.204    | Northern | 15.85 °C | 1850 to 3410               | 984 to 1877  |
| Alta Verapaz               | AV      | 90.509   | 15.423    |          |          |                            |              |

maT: mean annual temperature, maR: mean annual rainfall, ar m asl: altitudinal range in meters above sea level

**Table S2.** Conditions for each multiplex PCR.

| Multiplex | Annealing temperature | Final concentration | Primer name | Size range | Fluorescent label |
|-----------|-----------------------|---------------------|-------------|------------|-------------------|
| M1        | 63.4 °C               | 0.3 µM              | AVAG05      | 83-125     | 6-FAM             |
|           |                       |                     | AVAG13      | 96-160     | VIC               |
|           |                       | 1.2 µM              | AVT436      | 152        | NED               |
|           |                       |                     | AVAG11      | 105-161    | PET               |
| M2        | 57.6 °C               | 0.25 µM             | AVAG21      | 158-221    | VIC               |
|           |                       |                     | AVAG22      | 103-137    | NED               |
|           |                       |                     | AVAG25      | 96-140     | PET               |
|           |                       | 0.5 µM              | AVAG07      | 98-114     | 6-FAM             |
|           |                       |                     | AUCR418     | 379        | VIC               |
|           |                       |                     | AVMIX04     | 160-194    | 6-FAM             |
| M3        | 65 °C                 | 0.5 µM              | AVD001      | 208-267    | NED               |
|           |                       | 1.0 µM              | AVD022      | 220-258    | PET               |

**Table S3.** Characterization of 12 simple sequence repeat (SSR) loci in wild Guatemalan avocado germplasm.

| Locus                | Na    | ar    | Ho   | He   | H    | F <sub>ST</sub> | F <sub>IS</sub> | Nm     | Evenness | HWE |
|----------------------|-------|-------|------|------|------|-----------------|-----------------|--------|----------|-----|
| AVAG05 <sup>a</sup>  | 25    | 13.41 | 0.49 | 0.83 | 2.18 | 0.01            | 0.4             | 6.51   | 0.6      | *   |
| AVAG11 <sup>a</sup>  | 24    | 13.29 | 0.42 | 0.78 | 2.01 | 0.15            | 0.37            | 4.85   | 0.53     | *   |
| AVAG13 <sup>a</sup>  | 31    | 20.57 | 0.69 | 0.89 | 2.69 | 0               | 0.22            | 12.91  | 0.6      | *   |
| AVT436 <sup>b</sup>  | 9     | 6.72  | 0.44 | 0.76 | 1.6  | 0.03            | 0.4             | 7.81   | 0.79     | *   |
| AUCR418 <sup>b</sup> | 32    | 18.7  | 0.57 | 0.87 | 2.51 | 0               | 0.35            | 27.53  | 0.57     | *   |
| AVAG07 <sup>a</sup>  | 16    | 6.93  | 0.31 | 0.58 | 1.34 | 0.28            | 0.26            | 14.46  | 0.49     | *   |
| AVAG21 <sup>a</sup>  | 20    | 12.18 | 0.66 | 0.83 | 2.07 | 0.01            | 0.2             | 11.11  | 0.7      | *   |
| AVAG22 <sup>b</sup>  | 29    | 21.3  | 0.79 | 0.92 | 2.83 | 0.01            | 0.14            | 13.64  | 0.7      | *   |
| AVAG25 <sup>a</sup>  | 19    | 11.55 | 0.51 | 0.85 | 2.13 | 0.01            | 0.39            | 14.46  | 0.75     | *   |
| AVD001 <sup>b</sup>  | 31    | 20.35 | 0.66 | 0.94 | 2.91 | 0               | 0.3             | 24.75  | 0.79     | *   |
| AVD022 <sup>a</sup>  | 24    | 13.86 | 0.49 | 0.83 | 2.22 | 0.01            | 0.4             | 124.75 | 0.61     | *   |
| AVMIX04 <sup>a</sup> | 26    | 17.13 | 0.71 | 0.91 | 2.64 | 0               | 0.21            | 15.38  | 0.76     | *   |
| mean                 | 23.83 | 14.67 | 0.56 | 0.83 | 2.26 | 0.04            | 0.3             | 12.25  | 0.66     |     |

a= from [21] b= from [24], Na: observed number of alleles per locus, ar: allelic richness, Ho: observed heterozygosity, He: expected heterozygosity; H: Shannon diversity index; F<sub>ST</sub>: fixation index, F<sub>IS</sub>: inbreeding coefficient, HWE: Hardy-Weinberg equilibrium test. \* indicates significance of p value at ≤ 0.01

**Table S4.** Comparison of first five principal components in entire germplasm and core collections of wild Guatemalan avocado.

| Collection       | Statistics             | Principal components |       |       |       |       |
|------------------|------------------------|----------------------|-------|-------|-------|-------|
|                  |                        | PC1                  | PC2   | PC3   | PC4   | PC5   |
| Entire germplasm | Standard deviation     | 1.334                | 1.111 | 1.092 | 1.043 | 0.949 |
|                  | Proportion of variance | 0.222                | 0.154 | 0.149 | 0.136 | 0.113 |
|                  | Cumulative proportion  | 0.222                | 0.377 | 0.526 | 0.662 | 0.775 |
| Core Collection  | Standard deviation     | 1.364                | 1.108 | 1.103 | 1.023 | 0.938 |
|                  | Proportion of variance | 0.232                | 0.154 | 0.152 | 0.131 | 0.110 |
|                  | Cumulative proportion  | 0.232                | 0.386 | 0.538 | 0.669 | 0.779 |

**Table S5.** Selected genotypes for avocado core collection.

| Genotype   | Population | Region  | Genetic Cluster | Genotype    | Population | Region   | Genetic Cluster |
|------------|------------|---------|-----------------|-------------|------------|----------|-----------------|
| Chi.71     | Chi        | Central | 02              | To-Qui.101  | To-Qui     | Western  | 03              |
| Chi.74     | Chi        | Central | 01              | To-Qui.105  | To-Qui     | Western  | 01              |
| Chi.83     | Chi        | Central | 02              | To-Qui.121  | To-Qui     | Western  | 01              |
| Chi.88     | Chi        | Central | 01              | To-Qui.128  | To-Qui     | Western  | 03              |
| Sac.11     | Sac        | Central | 02              | To-Qui.131  | To-Qui     | Western  | 02              |
| Sac.13     | Sac        | Central | 01              | To-Qui.134  | To-Qui     | Western  | 03              |
| Sac.18     | Sac        | Central | 01              | Hue-Qui.137 | Hue-Qui    | Western  | 02              |
| Sac.23     | Sac        | Central | 02              | Hue-Qui.143 | Hue-Qui    | Western  | 03              |
| Sac.26     | Sac        | Central | 02              | Hue-Qui.147 | Hue-Qui    | Western  | 03              |
| Sac.29     | Sac        | Central | 02              | Hue-Qui.152 | Hue-Qui    | Western  | 03              |
| Sac.31     | Sac        | Central | 03              | Hue-Qui.157 | Hue-Qui    | Western  | 01              |
| Sac.33     | Sac        | Central | 03              | AV.174      | AV         | Northern | 03              |
| Sac-Chi.39 | Sac-Chi    | Central | 02              | AV.177      | AV         | Northern | 02              |
| Sac-Chi.41 | Sac-Chi    | Central | 03              | AV.176      | AV         | Northern | 01              |
| Sac-Chi.46 | Sac-Chi    | Central | 03              | AV.182      | AV         | Northern | 03              |
| Sac-Chi.56 | Sac-Chi    | Central | 01              | AV.185      | AV         | Northern | 03              |
| Sac-Chi.64 | Sac-Chi    | Central | 01              | BV.159      | BV         | Northern | 03              |
| Sol.91     | Sol        | Central | 03              | BV.161      | BV         | Northern | 02              |
| Sol.97     | Sol        | Central | 01              | BV.164      | BV         | Northern | 01              |
